# Supplementary material
Source: publisher figshare collection journal article supplement (https://asha.figshare.com/articles/dataset/_/24514564)
Supplement: Supplementary file 1 [file 1]

**Supplemental Material S1.** Summary of study quality coding for each paper, study quality criteria used to assess 21 studies, and excluded studies.

**Table S1.** Summary of study quality coding for each paper, according to modified criteria from the NIH Quality Assessment Tool for Observational Cohort & Cross-sectional Studies (2014). Please see Table 2 below for details regarding each criterion.

| Study Name                        | C1 | C2 | C3 | C4 | C5 | C6 | C7 | C8 | C9 | C10 | C11 | C12 | Total Score |
|-----------------------------------|----|----|----|----|----|----|----|----|----|-----|-----|-----|-------------|
| Aarne et al., 2014                | 1  | 1  | 0  | 1  | 0  | 1  | 1  | 1  | 1  | 0   | 1   | 0   | 8           |
| Andrés-Roqueta et al., 2016       | 1  | 1  | 1  | 1  | 0  | 1  | 1  | 0  | 1  | 1   | 1   | 1   | 10          |
| Bakopoulou, 2010                  | 1  | 1  | 0  | 1  | 0  | 1  | 1  | 1  | 1  | 1   | 1   | 0   | 9           |
| Black, 1989                       | 1  | 1  | 1  | 1  | 0  | 1  | 1  | 1  | 1  | 1   | 1   | 0   | 10          |
| Charman et al., 2015              | 1  | 1  | 0  | 1  | 0  | 1  | 1  | 1  | 1  | 1   | 1   | 1   | 10          |
| Chiat & Roy, 2008                 | 1  | 1  | 1  | 1  | 0  | 1  | 1  | 0  | 1  | 1   | 1   | 1   | 10          |
| Coales et al., 2019               | 1  | 1  | 0  | 1  | 0  | 1  | 1  | 1  | 1  | 1   | 1   | 1   | 10          |
| Conti-Ramsden & Botting, 2004     | 1  | 1  | 1  | 1  | 0  | 1  | 1  | 1  | 1  | 1   | 1   | 0   | 10          |
| Dockrell & Lindsay, 2000          | 1  | 1  | 0  | 1  | 0  | 1  | 0  | 0  | 1  | 1   | 1   | 0   | 7           |
| Farmer, 2000                      | 1  | 1  | 0  | 1  | 0  | 1  | 1  | 1  | 1  | 1   | 1   | 1   | 10          |
| Farmer & Oliver, 2005             | 1  | 1  | 1  | 1  | 0  | 1  | 1  | 1  | 1  | 1   | 1   | 0   | 10          |
| Feeney et al., 2015               | 1  | 1  | 0  | 0  | 0  | 1  | 1  | 1  | 1  | 0   | 1   | 0   | 7           |
| Gibson et al., 2013               | 1  | 1  | 1  | 1  | 0  | 1  | 1  | 1  | 1  | 1   | 1   | 0   | 10          |
| Hart et al., 2004                 | 1  | 1  | 0  | 1  | 0  | 1  | 1  | 1  | 1  | 1   | 1   | 1   | 10          |
| Horwitz et al., 2003              | 1  | 1  | 1  | 1  | 0  | 0  | 1  | 1  | 0  | 1   | 1   | 1   | 9           |
| Knox, 2001                        | 1  | 1  | 1  | 1  | 0  | 1  | 1  | 1  | 1  | 1   | 1   | 0   | 10          |
| McAndrew, 2001                    | 1  | 1  | 1  | 1  | 0  | 1  | 1  | 1  | 1  | 1   | 1   | 1   | 11          |
| Redmond & Rice, 2002              | 1  | 1  | 1  | 1  | 0  | 1  | 1  | 1  | 1  | 1   | 0   | 1   | 11          |
| Schachinger-Lorentzon et al, 2018 | 1  | 1  | 0  | 0  | 0  | 1  | 1  | 0  | 1  | 0   | 1   | 0   | 6           |
| St. Clair et al., 2011            | 1  | 1  | 1  | 1  | 0  | 1  | 1  | 1  | 1  | 1   | 1   | 1   | 11          |
| Stern et al., 1995                | 1  | 1  | 1  | 1  | 0  | 1  | 1  | 1  | 1  | 0   | 0   | 0   | 8           |

**Table S2.** Summary of the study quality criteria used to assess 21 studies. The criteria were modified according to the NIH Quality Assessment Tool for Observational Cohort & Cross-sectional Studies (2014).

| Criterion                         | Description                                                                                                                                                                                                                                                     | Coding                                                                                                                                              |
|-----------------------------------|-----------------------------------------------------------------------------------------------------------------------------------------------------------------------------------------------------------------------------------------------------------------|-----------------------------------------------------------------------------------------------------------------------------------------------------|
| C1. Research Question             | Was the research question or objective clearly stated?                                                                                                                                                                                                          | 1= yes<br>0= no                                                                                                                                     |
| C2. Study Population              | Was the study population clearly specified and defined?                                                                                                                                                                                                         | 1= yes<br>0= no                                                                                                                                     |
| C3. Participation                 | Did the study report a participation rate?                                                                                                                                                                                                                      | 1 = yes<br>0 = no                                                                                                                                   |
| C4. Inclusion and Exclusion       | Were all the subjects selected or recruited from the same or similar populations (including the same time period)? Were inclusion and exclusion criteria for being in the study prespecified and applied uniformly to all participants?                         | 1= yes<br>0= no                                                                                                                                     |
| C5. Sample Size                   | Was the sample size justified in the study based on a power analysis, or variance and effect estimates provided?                                                                                                                                                | 1= yes<br>0= no                                                                                                                                     |
| C6. Exposure                      | Was the assessment of language before the assessment of social competence?                                                                                                                                                                                      | 1= yes<br>0= no                                                                                                                                     |
| C7. Validated Language Instrument | Did the study include a validated instrument in the assessment of language? If participants were diagnosed prior to the study, were participants assessed with a validated instrument of language?<br><br>**if has both validated and non-validated, code 1=yes | 1 = yes<br>0 = no<br><br><i>Validated measure = PPVT, CELF, CCC-2, TROG, BPVS, etc.</i><br><i>Non-validated measure = created by the researcher</i> |
| C8. Validated Social Instrument   | Did the study include a validated instrument in the assessment of social competence?<br><br>**if has both validated and non-validated, code 1=yes                                                                                                               | 1 = yes<br>0 = no<br><br><i>Validated measure = SSRS, SDQ, BASC-3</i><br><i>Non-validated measure = created by the researcher</i>                   |

|                                   |                                                                                                                                                                             |                                                                                                                                  |
|-----------------------------------|-----------------------------------------------------------------------------------------------------------------------------------------------------------------------------|----------------------------------------------------------------------------------------------------------------------------------|
| C9. Objective Language Instrument | Did the study include an objective reporter, multiple methods or multiple reporters in the assessment of language?                                                          | 1 = objective reporter (e.g., SLP), multiple methods (e.g., PPVT + CELF) or multiple reporters (e.g., SLP, teacher)<br>0= no     |
| C10. Objective Social Instrument  | Did the study include an objective reporter, multiple methods or multiple reporters in the assessment of social competence?                                                 | 1= objective reporter (e.g., teacher), multiple methods (e.g., SDQ + BASC-3) or multiple reporters (e.g., SLP, teacher)<br>0= no |
| C11. Attrition                    | Was the attrition rate less than or equal to 20%?                                                                                                                           | 1= yes<br>0= no                                                                                                                  |
| C12. Adjusted Effects             | Were key potential confounding variables measured and adjusted statistically for their impact on the relationship between language and social outcomes (e.g., age, gender)? | 1 = yes<br>0 = no                                                                                                                |
| Total                             | Sum all above to get a total score out of 12                                                                                                                                | Total Score /12                                                                                                                  |

**Table S3.** Excluded studies ("near-misses") with reasons for exclusion.

| Study Reference               | Reason                        |
|-------------------------------|-------------------------------|
| Aro et al., 2014              | No usable statistics          |
| Bradshaw, 2006                | No useable statistics*        |
| Botting & Conti-Ramsden, 2008 | Age range requirement unmet   |
| Bretherton et al., 2014       | No useable statistics*        |
| Carson et al., 1998           | No useable statistics         |
| Conti-Ramsden et al., 2019    | Age range requirement unmet   |
| Dahle & Loge, 2018            | No useable statistics*        |
| Dynia et al., 2019            | No useable statistics*        |
| Ellis, 1986                   | Irrelevant construct measure  |
| Flapper & Schoemaker, 2013    | No useable statistics*        |
| Ford & Milosky, 2008          | No useable statistics*        |
| Forrest et al., 2018          | Non-DLD sample (risk for DLD) |
| Forrest et al., 2020          | Non-DLD sample (risk for DLD) |
| Fujiki et al., 1996           | No useable statistics*        |
| Fujiki et al., 1999           | No useable statistics*        |
| Gertner et al., 1994          | No useable statistics*        |
| Guralnick et al., 1996        | No useable statistics*        |
| Helland et al., 2020          | No useable statistics*        |
| Irwin et al., 2002            | No useable statistics*        |
| Jerome et al., 2002           | Overlapping sample            |
| Justice et al., 2009          | No useable statistics*        |
| Laws et al., 2012             | No useable statistics*        |
| Le et al., 2020               | No useable statistics*        |
| Levickis et al., 2018         | No useable statistics         |
| Lundervold et al., 2008       | No useable statistics         |
| Nungesser, 2005               | No useable statistics*        |
| Marton et al., 2005           | No useable statistics*        |
| McCabe, 2005                  | No useable statistics*        |
| McCabe & Meller, 2004         | No useable statistics*        |
| McCormack et al., 2011        | No useable statistics*        |
| Murseep et al., 2012          | No useable statistics*        |
| Mok et al., 2014              | No useable statistics         |
| Paul et al., 1991             | No useable statistics*        |
| Potter, 2009                  | No useable statistics*        |
| Qi & Kaiser, 2004             | No useable statistics*        |
| Rinaldi et al., 2009          | No useable statistics*        |
| Robinson, 2012                | No useable statistics*        |
| Roy & Chiat, 2014             | No useable statistics*        |
| Stanton-Chapman et al., 2007  | No useable statistics*        |
| Timler, 2008                  | No useable statistics*        |
| Toseeb et al., 2020a          | Irrelevant construct measure  |
| Toseeb et al., 2020b          | No useable statistics         |

|                         |                        |
|-------------------------|------------------------|
| van Agt et al., 2005    | No useable statistics* |
| Vallance & Wintre, 1997 | No useable statistics* |
| Wang et al., 2018       | No useable statistics* |
| Yew & O'Kearney, 2017   | No useable statistics  |

*\*Studies that compared two groups (i.e., DLD children to typically developing children) or combined correlations for multiple groups (e.g., DLD children with typically developing children and a clinical sample)*

## References

- Aro, T., Laakso, M., Maatta, S., Tolvanen, A., & Poikkeus, A. (2014). Associations between toddler-age communication and kindergarten-age self-regulatory skills. *Journal of Speech, Language, and Hearing Research*, 57(4), 1405-1417. [http://doi.org/10.1044/2014\\_JSLHR-L-12-0411](http://doi.org/10.1044/2014_JSLHR-L-12-0411)
- Bradshaw, A. L. (2006). *Assessing effects of IQ on sociable and withdrawn behaviors in children with language impairment* [Unpublished master's thesis]. Brigham Young University.
- Botting, N., & Conti-Ramsden, G. (2008). The role of language, social cognition, and social skills in the functional social outcomes of young adults with and without a history of SLI. *British Journal of Developmental Psychology*, 26(2), 281-300. <https://doi.org/10.1348/026151007X235891>
- Bretherton, L., Prior, M., Bavin, E., Cini, E., Eadie, P., & Reilly, S. (2014). Developing relationships between language and behaviour in preschool children from the Early language in Victoria Study: Implications for intervention. *Emotional and Behavioural Difficulties*, 19(1), 7-27. <http://doi.org/10.1080/13632752.2013.854956>

- Carson, D. K., Klee, T., Perry, C. K., Muskina, G., & Donaghy, T. (1998). Comparisons of children with delayed and normal language at 24 months of age on measures of behavioral difficulties, social and cognitive development. *Infant Mental Health Journal*, 19(1), 59-75. [http://doi.org/ 10.1002/\(SICI\)1097-0355\(199821\)19:1<59::AID-IMHJ4>3.0.CO;2-V](http://doi.org/10.1002/(SICI)1097-0355(199821)19:1<59::AID-IMHJ4>3.0.CO;2-V)
- Conti-Ramsden, G., Mok, P., Durkin, K., Pickles, A., Toseeb, U., & Botting, N. (2019). Do emotional difficulties and peer problems occur together from childhood to adolescence? The case of children with a history of developmental language disorder (DLD). *European Child and Adolescent Psychiatry*, 28, 993-1004. [http://doi.org/ 10.1007/s00787-018-1261-6](http://doi.org/10.1007/s00787-018-1261-6)
- Dahle, A. E. & Loge, I. K. (2018). Co-existing weak language skills and weak social skills in 33-month-old Norwegian children referred to the School Psychology Service for language difficulties or social difficulties. *European Early Childhood Education Research Journal*, 26(6), 909-926. [http://doi.org/ 10.1080/1350293X.2018.1533708](http://doi.org/10.1080/1350293X.2018.1533708)
- Dynia, J. M., Bean, A., Justice, L. M., & Kaderavek, J. N. (2019). Phonological awareness emergence in preschool children with autism spectrum disorder. *Autism & Developmental Language Impairments*, 4, 1-15. [http://doi.org/ 10.1177/2396941518822453](http://doi.org/10.1177/2396941518822453)
- Ellis, J. L. (1986). Interpersonal problem solving and social adjustment of children with speech and language disorders. [Unpublished doctoral dissertation]. University of North Varolina at Chapel Hill.

- Flapper, B. C. T. & Schoemaker, M. M. (2013). Developmental coordination disorder in children with specific language impairment: Co-morbidity and impact on quality of life. *Research in Developmental Disabilities*, 34(2), 756-763. <http://doi.org/10.1016/j.ridd.2012.10.014>
- Ford, J. A. & Milosky, L. M. (2008). Inference generation during discourse and its relation to social competence: An online investigation of abilities of children with and without language impairment. *Journal of Speech, Language, and Hearing Research*, 51, 367-380. [http://doi.org/10.1044/1092-4388\(2008/027\)](http://doi.org/10.1044/1092-4388(2008/027))
- Forrest, C. L., Gibson, J. L., Halligan, S. L., & St. Clair, M. C. (2018). A longitudinal analysis of early language difficulty and peer problems on later emotional difficulties in adolescence: Evidence from the Millennium Cohort Study. *Autism & Developmental Language Impairments*, 3, 1-15. <http://doi.org/10.1177/2396941518795392>
- Forrest, C. L., Gibson, J. L., Halligan, S. L., & St. Clair, M. C. (2020). A cross-lagged analysis of emotion regulation, peer problems, and emotional problems in children with and without early language difficulties: Evidence from the Millennium Cohort Study. *Journal of Speech, Language, and Hearing Research*, 63(4), 1227-1239. [http://doi.org/10.1044/2020\\_JSLHR-19-00188](http://doi.org/10.1044/2020_JSLHR-19-00188)
- Fujiki, M., Brinton, B., & Todd, C. M. (1996). Social skills of children with specific language impairment. *Language, Speech, and Hearing Services in Schools*, 27, 195-202. <http://doi.org/10.1044/0161-1461.2703.195>

- Fujiki, M., Brinton, B., Morgan, M., & Hart, C. H. (1999). Withdrawn and sociable behavior of children with language impairment. *Language, Speech, and Hearing Services in Schools, 30*(2), 183-195. <http://doi.org/10.1044/0161-1461.3002.183>
- Gertner, B. L., Rice, M. L., & Hadley, P. A. (1994). Influence of communicative competence on peer preferences in a preschool classroom. *Journal of Speech and Hearing Research, 37*, 913-923. <http://doi.org/10.1044/jshr.3704.913>
- Gurlanick, M. J., Connor, R. T., Hammond, M. A., Gottman, J. M., & Kinnish, K. (1996). The peer relations of preschool children with communication disorders. *Child Development, 67*, 471-489. <http://doi.org/10.1111/j.1467-8624.1996.tb01746.x>
- Helland, W. A., Posserud, M., Lundervold, A. J. (2020). Emotional and behavioural function in children with language problems: A longitudinal, population-based study. *European Journal of Special Needs Education, 37*(2), 177-190. <http://doi.org/10.1080/08856257.2020.1857930>
- Irwin, J. R., Carter, A. S., & Briggs-Gowan, M. J. (2002). The social-emotional development of "late-talking" toddlers. *Journal of the American Academy of Child & Adolescent Psychiatry, 41*(11), 1324-1332. <http://doi.org/10.1097/00004583-200211000-00014>
- Jerome, A. C., Fujiki, M., Brinton, B., & James, S. L. (2002). Self-esteem in children with specific language impairment. *Journal of Speech, Language, and Hearing Research, 45*(4), 700-714. [http://doi.org/10.1044/1092-4388\(2002/056\)](http://doi.org/10.1044/1092-4388(2002/056))
- Justice, L. M., Bowles, R. P., Pence Turnbull, K. L., & Skibbe, L. E. (2009). School readiness among children with varying histories of language difficulties. *Developmental Psychology, 45*(2), 460-476. <http://doi.org/10.1037/a0014324>



- Laws, G., Bates, G., Feuerstein, M., Mason-Apps, E., White, C. (2012). Peer acceptance of children with language and communication impairments in a mainstream primary school: Associations with type of language difficulty, problem behaviours and a change in placement organization. *Child Language Teaching and Therapy*, 28(1), 73-86. <http://doi.org/10.1177/0265659011419234>
- Le, H. N. D., Petersen, S., Mensah, F., Gold, L., Wake, M., Reilly, S. (2020). Health-related quality of life in children with low language or congenital hearing loss, as measured by the PedsQL and Health Utility Index Mark 3. *Value in Health*, 23(2), 164-170. <http://doi.org/10.1016/j.jval.2019.07.019>
- Levickis, P., Sciberras, E., McKean, C., Conway, L., Pezic, A., Mensah, F. K., Bavin, E. L., Bretherton, L., Eadie, P., Prior, M., & Reilly, S. (2018). Language and social-emotional and behavioural wellbeing from 4 to 7 years: A community-based study. *European Child and Adolescent Psychiatry*, 27(7), 849-859. <http://doi.org/10.1007/s00787-017-1079-7>
- Lundervold, A. J., Heimann, M., & Manger, T. (2008). Behaviour-emotional characteristics of primary-school children rated as having language problems. *British Journal of Educational Psychology*, 78(4), 567-580. <http://doi.org/10.1348/000709908X320480>
- Nungesser, N. R. (2005). *You gotta heave friends: An analysis of social relations in preschool children with speech and language impairment* [Unpublished doctoral dissertation]. University of Illinois at Urbana-Champaign.

- Marton, K., Abramoff, B., & Rosenzweig, S. (2005). Social cognition and language in children with specific language impairment (SLI). *Journal of Communication Disorders*, 38(2), 143-162. <http://doi.org/10.1016/j.jcomdis.2004.06.003>
- McCabe, P. C. (2005). Social and behavioral correlates of preschoolers with specific language impairment. *Psychology in the Schools*, 42(4), 373-387. <http://doi.org/10.1002/pits.20064>
- McCabe, P. C. & Meller, P. J. (2004). The relationship between language and social competence: How language impairment affects social growth. *Psychology in the Schools*, 41(3), 313-321. <http://doi.org/10.1002/pits.10161>
- McCormack, J., Harrison, L. J., McLeod, S., & McAllister, L. (2011). A nationally representative study of the association between communication impairment at 4-5 years and children's life activities at 7-9 years. *Journal of Speech, Language, and Hearing Research*, 54(5), 1328-1348. [http://doi.org/10.1044/1092-4388\(2011/10-0155\)](http://doi.org/10.1044/1092-4388(2011/10-0155))
- Mok, P. L., Pickles, A., Durkin, K., & Conti-Ramsden, G. (2014). Longitudinal trajectories of peer relations in children with specific language impairment. *Journal of Child Psychology and Psychiatry, and Allied Disciplines*, 55(5), 516–527. <https://doi.org/10.1111/jcpp.12190>
- Mursepp, I., Aibast, H., Gapeyeva, H., Paasuke, M. (2012). Motor skills, haptic perception, and social abilities in children with mild speech disorders. *Brain & Development*, 34(2), 128-132. <http://doi.org/10.1016/j.braindev.2011.02.002>

- Paul, R., Looney, S. S., & Dahm, P. S. (1991). Communication and socialization skills at ages 2 and 3 in "late-talking" young children. *Journal of Speech and Hearing Research, 34*, 858-865.
- Potter, J. L. (2009). *The relationship of language and emotion understanding to sociable behavior of children with language impairment* [Unpublished master's thesis]. Brigham Young University.
- Qi, C. H. & Kaiser, A. P. (2004). Problem behaviors of low-income children with language delays: An observation study. *Journal of Speech, Language, and Hearing Research, 47*(3), 595-609. [http://doi.org/10.1044/1092-4388\(2004/046\)](http://doi.org/10.1044/1092-4388(2004/046))
- Rinaldi, C., Rogers-Adkinson, D., Arora, A. (2009). An exploratory study of the oral language and behavior skills of children with identified language and emotional disabilities in preschool. *International Journal of Early Childhood Special Education, 1*(1), 32-45.
- Robinson, K. (2012). *The social well-being of children with specific language impairment (SLI): What goes with what?* [Unpublished doctoral dissertation]. University of Exeter.
- Roy, P. & Chiat, S. (2014). Developmental pathways of language and social communication problems in 9–11-year-olds: Unpicking the heterogeneity. *Research in Developmental Disabilities, 35*, 2534-2546. <http://doi.org/10.1016/j.ridd.2014.06.014>
- Stanton-Chapman, T. L., Justice, L. M., Skibbe, L. E., & Grant, S. L. (2007). Social and behavioral characteristics of preschoolers with specific language impairment.

*Topics in Early Childhood Special Education*, 27(2), 98-109.

<http://doi.org/10.1177/02711214070270020501>

Timler, G. R. (2008). Social knowledge in children with language impairments:

Examination of strategies, predicted consequences, and goals in peer conflict situations. *Clinical Linguistics & Phonetics*, 22(9), 741-763.

<http://doi.org/10.1080/02699200802212470>

Toseeb, U., Gibson, J. L., Newbury, D. F., Orlik, W., Durkin, K., Pickles, A., & Conti-

Ramsden, G. (2020). Play and prosociality are associated with fewer externalizing problems in children with developmental language disorder: The role of early language and communication environment. *International Journal of Language & Communication Disorders*, 55(4), 583-602. [http://doi.org/10.1111/1460-](http://doi.org/10.1111/1460-6984.12541)

6984.12541

Toseeb, U. & St. Clair, M. C. (2020). Trajectories of prosociality from early to middle

childhood in children at risk of developmental language disorder. *Journal of Communication Disorders*, 85, 1-11. <http://doi.org/10.1016/j.jcomdis.2020.105984>

van Agt, H. M. E., Essink-Bot, M., van der Stege, H. A., de Ridder-Sluis, J. G., & de

Koning, H. J. (2005). Quality of life of children with language delays. *Quality of Life Research*, 14(5), 1345-1355. <http://doi.org/10.1007/s11136-004-6013-z>

Vallance, D. D. & Wintre, M. G. (1997). Discourse processes underlying social

competence in children with language learning disabilities. *Development and Psychopathology*, 9, 95-108.

Wang, C., Harrison, L. J., McLeod, S., Walker, S., Spilt, J. L. (2018). Can teacher-child relationships support human rights to freedom of opinion and expression,

education, and participation? *International Journal of Speech-Language*

*Pathology*, 20(1), 133-141. <http://doi.org/10.1080/17549507.2018.1408855>

Yew, S. G. K. & O'Kearney, R. (2017). Language difficulty at school entry and the trajectories of hyperactivity-inattention problems from ages 4 to 11: Evidence from a population-representative cohort study. *Journal of Abnormal Child Psychology*, 45, 1105-1118.

Studies included in the meta-analysis ( $N = 21$ ).

## References

- Aarne, P., Almkvist, O. Mothander, P. R., & Tallberg, I. (2014). Parent-rated socio-emotional development in children with language impairment in comparison with typically developed children. *European Journal of Developmental Psychology*, 11(3), 279-291. <https://doi.org/10.1080/17405629.2013.817332>
- Andres-Roqueta, C., Adrian, J. E., Clemente, R. A., & Villanueva, L. (2016). Social cognition makes an independent contribution to peer relations in children with specific language impairment. *Research in Developmental Disabilities*, 49-50, 277-290. <http://doi.org/10.1016/j.ridd.2015.12.015>
- Bakopoulou, I. (2010). *The socio-emotional functioning of primary aged children with specific language impairment* [Unpublished doctoral dissertation]. University of London.
- Black, L. M. (1989). *Subtypes of language disordered children at risk for social-emotional problems* [Unpublished doctoral dissertation]. New School for Social Research.
- Charman, T., Ricketts, J., Dockrell, J. E., Lindsay, G., & Palikara, O. (2015). Emotional and behavioural problems in children with language impairments and children with autism spectrum disorders. *International Journal of Language and Communication Disorders*, 50(1), 84-93. <http://doi.org/10.1111/1460-6984.12116>
- Chiat, S. & Roy, P. (2008). Early phonological and sociocognitive skills as predictors of later language and social communication outcomes. *The Journal of Child*

*Psychology and Psychiatry*, 49(6), 635-645. [http://doi.org/ 10.1111/j.1469-7610.2008.01881.x](http://doi.org/10.1111/j.1469-7610.2008.01881.x)

Coales, C., Heaney, N., Ricketts, J., Dockrell, J. E., Lindsay, G., Palikara, O., & Charman, T. (2019). Health-related quality of life in children with autism spectrum disorders and children with developmental language disorders. *Autism & Developmental Language Impairments*, 4, 1-14. [http://doi.org/ 10.1177/2396941519851225](http://doi.org/10.1177/2396941519851225)

Conti-Ramsden, G. & Botting, N. (2004). Social difficulties and victimization in children with SLI at 11 years of age. *Journal of Speech, Language, and Hearing Research*, 47(1), 145-161. [http://doi.org/ 10.1044/1092-4388\(2004/013\)](http://doi.org/10.1044/1092-4388(2004/013))

Dockrell, J. & Lindsay, G. (2000). Meeting the needs of children with specific speech and language difficulties. *European Journal of Special Needs Education*, 15(1), 24-41. <https://doi.org/10.1080/088562500361682>

Farmer, M. (2000). Language and social cognition in children with specific language impairment. *Journal of Child Psychology and Psychiatry*, 41(5), 627-636. [http://doi.org/ 10.1111/1469-7610.00649](http://doi.org/10.1111/1469-7610.00649)

Farmer, M. & Oliver, A. (2005). Assessment of pragmatic difficulties and socio-emotional adjustment in practice. *International Journal of Language & Communications Disorders*, 40(4), 403-429. [http://doi.org/ 10.1080/13682820400027743](http://doi.org/10.1080/13682820400027743)

Feeney, R., Desha, L., Khan, A., Ziviani, J., & Nicholson, J. M. (2016). Speech and language difficulties along with other child and family factors associated with

- health-related quality of life of Australian children. *Applied Research Quality Life*, 11, 1379-1397. <http://doi.org/10.1007/s11482-015-9443-6>
- Gibson, J., Adams, C., Lockton, E., & Green, J. (2013). Social communication disorder outside autism? A diagnostic classification approach to delineating pragmatic language impairment, high functioning autism, and specific language impairment. *The Journal of Child Psychology and Psychiatry*, 54(11), 1186-1197. <http://doi.org/10.1111/jcpp.12079>
- Hart, K. I., Fujiki, M., Brinton, B., & Hart, C. H. (2004). The relationship between social behavior and severity of language impairment. *Journal of Speech, Language, and Hearing Research*, 47, 647-662. [http://doi.org/10.1044/1092-4388\(2004/050\)](http://doi.org/10.1044/1092-4388(2004/050))
- Horwitz, S. M., Irwin, J. R., Briggs-Gowan, M. J., Bosson Heenan, J. M., Mendoza, J., & Carter, A. S. (2003). Language delay in a community cohort of young children. *Journal of the American Academy of Child and Adolescent Psychiatry*, 42(8), 932-940. <http://doi.org/10.1097/01.CHI.0000046889.27264.5E>
- Knox, E. L. (2001). *Educational and social-behavioural outcomes of children with specific language impairment at 11 years* [Unpublished doctoral dissertation]. University of Manchester.
- McAndrew, E. M. (2001). *Language disorders in children: Associated psychological problems, social competence, and peer acceptance* [Unpublished doctoral dissertation]. University of Surrey.
- Redmond, S. M. & Rice, M. L. (2002). Stability of behavioral ratings of children with SLI. *Journal of Speech, Language, and Hearing Research*, 45, 190-201. [http://doi.org/10.1044/1092-4388\(2002/014\)](http://doi.org/10.1044/1092-4388(2002/014))



- Schachinger-Lorentzon, U., Kadesjo, B., Gillberg, C., & Miniscalco, C. (2018). Children screening positive for language delay at 2.5 years: Language disorder and developmental profiles. *Neuropsychiatric Disease and Treatment*, 14, 3267-3277. [http://doi.org/ 10.2147/NDT.S179055](http://doi.org/10.2147/NDT.S179055)
- St. Clair, M. C., Pickles, A., Durkin, K., & Conti-Ramsden, G. (2011). A longitudinal study of behavioral, emotional, and social difficulties in individuals with a history of specific language impairment (SLI). *Journal of Communication Disorders*, 44(2), 186-199. [http://doi.org/ 10.1016/j.jcomdis.2010.09.004](http://doi.org/10.1016/j.jcomdis.2010.09.004)
- Stern, L. M., Connell, T. M., Lee, M., & Greenwood, G. (1995). The Adelaide preschool language unit: Results of follow-up. *Journal of Paediatrics and Child Health*, 31(3), 207-212. [http://doi.org/ 10.1111/j.1440-1754.1995.tb00787.x](http://doi.org/10.1111/j.1440-1754.1995.tb00787.x)
