# Supplementary material
Source: publisher figshare collection journal article supplement (https://asha.figshare.com/articles/dataset/_/24514564)
Supplement: Supplementary file 3 [file 1]

**Supplemental Material S2.** Psychometric properties of the social measures and language measures included in the meta-analysis.

**Table S4.** Psychometric properties of the social measures included in the meta-analysis. The widest ranges reported were used (i.e., across subtests and composites), and the psychometrics properties for the most up-to-date measure were selected for reporting, when available.

| Measure                                                  | Author(s)                  | Internal Consistency (Alpha Coefficients) | Test-Retest Reliability (Correlation Coefficients) | Inter-Rater Reliability (Correlation Coefficients) | Construct Validity (Correlation Coefficients) | Criterion Validity (Correlation Coefficients)            | Measurement Error (Standard Error of Measurement) |
|----------------------------------------------------------|----------------------------|-------------------------------------------|----------------------------------------------------|----------------------------------------------------|-----------------------------------------------|----------------------------------------------------------|---------------------------------------------------|
| Bayley Scales for Infant and Toddler Development (BSITD) | Breinbauer et al., 2010    | .83 – .94                                 | .94 – .96                                          | –                                                  | .24 – .38                                     | –                                                        | –                                                 |
|                                                          | Albers & Grieve, 2007      | .71 – .94                                 | .64 – .94                                          | .73 – .82                                          |                                               | BSID & WISC–III<br>.71 – .83                             |                                                   |
|                                                          |                            |                                           |                                                    |                                                    |                                               | BSID & PLS–IV<br>.51–.71                                 |                                                   |
|                                                          |                            |                                           |                                                    |                                                    |                                               | BSID & Vineland & ABAS–III<br>.58–.70                    |                                                   |
| Child Behavior Checklist (CBCL)                          | Achenbach & Rescorla, 2001 | .63 – .97                                 | .82 – .93                                          | .57 – .88                                          | –                                             | Referred and non-referred children –<br><i>p</i> 's <.01 | –                                                 |
|                                                          |                            |                                           |                                                    |                                                    |                                               | CBCL & Conner's Rating Scales<br>.77 – .80               |                                                   |
|                                                          |                            |                                           |                                                    |                                                    |                                               | CBCL & BASC<br>.52 – .89                                 |                                                   |
| Child Behavior Questionnaire (CBQ)                       | Rutter, 1967               | –                                         | .89                                                | .72                                                | –                                             | –                                                        | –                                                 |
| Five-to-Fifteen (FTF)                                    | Kadesgo et al., 2004       | .69 – .96                                 | .55 – .91                                          | .44 – .85                                          | .563 – .953                                   |                                                          | –                                                 |

|                                                        |                             |           |           |            |                                                                                                                                                                                      |                                                                                                                                                                                                    |   |
|--------------------------------------------------------|-----------------------------|-----------|-----------|------------|--------------------------------------------------------------------------------------------------------------------------------------------------------------------------------------|----------------------------------------------------------------------------------------------------------------------------------------------------------------------------------------------------|---|
|                                                        | Trillingsgaard et al., 2004 | .84 – .93 |           |            | Can discriminate between ID, ASD, TS, ADHD, CD, anxiety disorders, OCD, depression, SLD                                                                                              | FTF & WISC–III<br>.097 – .47                                                                                                                                                                       |   |
|                                                        | Korkamn et al., 2004        | .78 – .89 |           |            | Can discriminate between TD and children at risk for developmental disorders                                                                                                         | FTF & NEPSY<br>–0.07 – –.449                                                                                                                                                                       |   |
| Harter Pictorial Scale of Perceived Competence (HPSPC) | Harter & Pike, 1984         | .75 – .89 | –         | .16 – .37  | Children asked to elaborate on responses to questions (See paper for details)<br><br>Can discriminate children held back in school, those not accepted by peers, maternal acceptance | Cognitive competence. & Preference for difficult tasks<br>.42                                                                                                                                      | – |
| Infant-toddler Social and Emotional Assessment (ITSEA) | Carter et al., 2003         | .45 – .90 | .69 – .90 | .43 – 0.79 | –                                                                                                                                                                                    | ITSEA & CBCL<br>–.21 – .67<br><br>ITSEA & CCTI<br>–.57 – .53<br><br>ITSEA & CES–D<br>–.20 – .29<br><br>ITSEA & BAI<br>–.12 – .26<br>ITSEA & VABS<br>–.30 – .58<br><br>ITSEA & Mullen<br>–.16 – .47 | – |
| KIDSCREEN-52                                           | Ravens-Sieberger, 2005      | .77 – .89 | –         | –          | KIDSCREEN-52 & KINDL<br>.18 – .68                                                                                                                                                    | KIDSCREEN-52 & Psychosomatic Health Complaints Index                                                                                                                                               | – |

|                                                  |                         |           |                            |                            | KIDSCREEN-52<br>discriminates based on<br>age, SES, and gender                                                                      | -.53 – -.20        |    |
|--------------------------------------------------|-------------------------|-----------|----------------------------|----------------------------|-------------------------------------------------------------------------------------------------------------------------------------|--------------------|----|
| Kohn Social Competence Scale (KSCS)              | Kohn, 1977              | –         | –                          | .73 – .80                  | –                                                                                                                                   | –                  | –  |
| Junior Rating Scale (JRS)                        | Abraham & Lindsay, 1990 | –         | .95                        | –                          | –                                                                                                                                   | –                  | –  |
| Manchester Inventory for Play Observation (MIPO) | Gibson et al., 2011     | .92       | .58<br>(kappa coefficient) | .77<br>(kappa coefficient) | MIPO can discriminate TD, ASD, DLD, internalizing and externalizing disorders                                                       | MIPO & SSRS<br>.78 | –  |
| My Life in School (MLIS)                         | -                       | NA        | NA                         | NA                         | NA                                                                                                                                  | NA                 | NA |
| Pediatric Quality of Life Inventory (Peds-QL)    | Varni et al., 2001      | .71 – .90 | –                          | –                          | Peds-QL can discriminate healthy children from acute and chronically ill children, scores are related to # of days of school missed | –                  | –  |
| Personality Inventory of Children (PIC)          | Lachar, 1982            | .81– .92  | .82 – .91                  | –                          | –                                                                                                                                   | –                  | –  |
| Peer Nominations                                 | -                       | NA        | NA                         | NA                         | NA                                                                                                                                  | NA                 | NA |
| Personalized Postal Questionnaire (PPQ)          | -                       | NA        | NA                         | NA                         | NA                                                                                                                                  | NA                 | NA |
| Self-Perception Profile for Children (SPPC)      | Harter, 2012            | .71 – .91 | –                          | –                          | SPPC & Self-Description Questionnaires<br>.56 – .69                                                                                 | –                  | –  |
| Strengths & Difficulties Questionnaire (SDQ)     | Goodman, 2001           | .73       | .62                        | .34                        | –                                                                                                                                   | –                  | –  |

|                                         |                            |           |           |           |    |                                                                                                                                    |    |
|-----------------------------------------|----------------------------|-----------|-----------|-----------|----|------------------------------------------------------------------------------------------------------------------------------------|----|
| Teacher Behavior Rating Scale (TBRs)    | -                          | NA        | NA        | NA        | NA | NA                                                                                                                                 | NA |
| Teacher Report Form (TRF)               | Achenbach & Rescorla, 2001 | .72 – .97 | .60 – .95 | .20 – .76 | –  | Referred and non-referred children – $p$ 's <.01<br><br>CBCL & Conner's Rating Scales<br>.77 – .80<br><br>CBCL & BASC<br>.52 – .89 | –  |
| Vineland Adaptive Behavior Scale (VABS) | -                          | NA        | NA        | NA        | NA | NA                                                                                                                                 | NA |

NA = No Access; The authors did not have access to the measure or technical manual including a psychometric property review. Attempts to contact the authors/publishers for information regarding the psychometric properties of the measures were made but a response was not received in time for the manuscript revision deadline.

MEASURE ABBREVIATIONS: BAI = Beck Anxiety Inventory; BASC = Behavior Assessment System for Children; CCTI = Colorado Child Temperament Inventory; CES-D = Center for Epidemiology Scale for Depression; PLS = Preschool Language Scale; SSRS = Social Skills Rating System; WISC = Weschler Intelligence Scale for Children; VABS = Vineland Adaptive Behavior Scale.

**Table S5.** Psychometric properties of the language measures included in the meta-analysis. The widest ranges reported were used (i.e., across subtests and composites), and the psychometrics properties for the most up-to-date measure were selected for reporting, when available.

| Measure                                                      | Author(s)                               | Internal Consistency (alpha coefficients) | Test-Retest Reliability (Correlation coefficients) | Inter-rater Reliability (Correlation coefficients) | Construct Validity (Correlation coefficients) | Criterion Validity (Correlation coefficients)                                                                                    | Measurement Error (Standard Error of Measurement) |
|--------------------------------------------------------------|-----------------------------------------|-------------------------------------------|----------------------------------------------------|----------------------------------------------------|-----------------------------------------------|----------------------------------------------------------------------------------------------------------------------------------|---------------------------------------------------|
| Assessment of Comprehension and Expression Naming Test (ACE) | Review available in Denman et al., 2017 | NA                                        | NA                                                 | NA                                                 | NA                                            | NA                                                                                                                               | NA                                                |
| British Picture Vocabulary Scale (BPVS)                      | Dunn et al., 2019                       | NA                                        | NA                                                 | NA                                                 | NA                                            | NAN                                                                                                                              | NA                                                |
| Children's Communication Checklist (CCC)                     | Bishop, 2003                            | .66 – .85                                 | .86 – .96                                          | –                                                  | –                                             | TD & DLD<br>Standard difference<br>.44 – 1.83<br>All <i>p</i> 's <.001                                                           | –                                                 |
|                                                              | Bishop et al., 2001                     |                                           |                                                    | .80                                                |                                               | TD & Pragmatic Language Impairment<br>.80 – 1.57<br>All <i>p</i> 's <.001<br><br>TD & ASD<br>1.05–2.60<br>All <i>p</i> 's < .001 |                                                   |
| Comprension de Estructuras Gramaticales (CEG)                | Mendoza et al., 2005                    | .91                                       | –                                                  | –                                                  | .12 – .80                                     | –                                                                                                                                | –                                                 |

|                                                                                   |                            |                           |           |           |           |                                              |             |
|-----------------------------------------------------------------------------------|----------------------------|---------------------------|-----------|-----------|-----------|----------------------------------------------|-------------|
| Clinical<br>Evaluation of<br>Language<br>Fundamentals<br>(CELF)                   | Semel et al.,<br>2003      | .69 – .91                 | .70 – .90 | –         | –         | –                                            | .38 – .3.53 |
|                                                                                   | Wiig et al.,<br>2013       | .75 – .96                 | .72 – .90 | .91 – .99 |           | CELF–5 & PPVT–4<br>.68 – .98                 |             |
|                                                                                   |                            |                           |           |           |           | CELF–5 & EVT–2<br>.65 – .98                  |             |
|                                                                                   |                            |                           |           |           |           | TD & DLD<br>standard<br>difference .94 – .71 |             |
| Children’s Test<br>of Non-word<br>Repetition<br>(CTNR)                            | Gathercole et<br>al., 1994 | .80 – .81                 | .77 – .80 | –         | –         | –                                            | –           |
| Evaluacion de<br>Lenguaje<br>Infantile (ELI)                                      | Saborit & Julia,<br>2005   | .70 – .84                 | –         | –         | .51 – .85 | –                                            | –           |
| Expressive<br>Vocabulary<br>One Word<br>Picture<br>Vocabulary<br>Test<br>(EOWPVT) | Martin &<br>Brownell, 2010 | .93 – .97                 | .97 – .98 | –         | –         | –                                            | –           |
| Kaufman<br>Assessment<br>Battery for<br>Children<br>(K-ABC)                       | Kaufman et al.,<br>1987    | .86 – .97<br>(split half) | .83 – .92 | –         | –         | K–ABC & WISC–III<br>.62 – .87                | –           |
|                                                                                   |                            |                           |           |           |           | K–ABC & PIAT<br>.29                          |             |
|                                                                                   |                            |                           |           |           |           | K–ABC<br>.65                                 |             |
| MacArthur<br>Communicative<br>Development<br>Inventory<br>(MCDI)                  | Dale et al.,<br>1989       | .67 – .96                 | .86 – .95 | –         | –         | –                                            | –           |

|                                                   |                        |           |           |           |                                                                                                                                    |                                                                                                                                |             |
|---------------------------------------------------|------------------------|-----------|-----------|-----------|------------------------------------------------------------------------------------------------------------------------------------|--------------------------------------------------------------------------------------------------------------------------------|-------------|
| McCarthy Scales of Children's Abilities (MSCA)    | Sands & D'Amato, 2018  | .79 – .88 | .69 – .91 | –         | –                                                                                                                                  | –                                                                                                                              | –           |
| Preschool Language Scale (PLS)                    | Zimmerman et al., 2011 | .91 – .98 | .86 – .95 | .96 – .99 | –                                                                                                                                  | PLS & CELF<br>.70 – .82                                                                                                        |             |
| PPQ                                               | -                      | NA        | NA        | NA        | NA                                                                                                                                 | NA                                                                                                                             | NA          |
| Peabody Picture Vocabulary Test (PPVT)            | Dunn & Dunn, 2007      | .94 – .95 | .92 – .96 | –         | PPVT–4 & EVT–2<br>.80 – .84<br><br>PPVT–4 & CASL & CELF–4<br>.37 – .79<br><br>PPVT–4 & GRADE<br>.63<br><br>PPVT–4 & PPVT –3<br>.84 | –                                                                                                                              | –           |
| New Reynell Developmental Language Scales (NRDLS) | Letts et al., 2014     | .95 – .96 | .57 – .64 | –         | NRDLS can discriminate TD vs. DLD children                                                                                         | NRDLS & BPVS–III<br>.63 – .75<br><br>NRDLS & TROG–II<br>.63 – .69                                                              |             |
| Stanford-Binet (SB)                               | Roid, 2003             | .84 – .98 | .76 – .95 | .74 – .98 | Age growth curves supported (See manual)<br><br>Loadings with “g” –<br>.70 – .80                                                   | SB5 & SB–IV<br>.64 – .90<br><br>SB5 & WPPSI–R<br>.45 – .83<br><br>SB5 & WISC–III<br>.42 – .85<br><br>SB5 & WJ–III<br>.36 – .78 | 1.07 – 4.85 |

|                                                             |                                                        |           |           |           |    |                                                                                                                                                                                                                                                                               |            |
|-------------------------------------------------------------|--------------------------------------------------------|-----------|-----------|-----------|----|-------------------------------------------------------------------------------------------------------------------------------------------------------------------------------------------------------------------------------------------------------------------------------|------------|
|                                                             |                                                        |           |           |           |    | SB5 & various<br>cognitive measures<br>tested on special<br>populations .66 –<br>.91<br>(WISC–R, WPPSI–<br>R, K–ABC, Form–<br>LM)                                                                                                                                             |            |
| Test of<br>Language<br>Development<br>(TOLD)                | Hamill &<br>Newcomer,<br>1997; Hayward<br>et al., 2008 | .81 – .96 | .80 – .92 | .99       | –  | TOLD & Bankson<br>Language Test<br>0.65 – 0.97                                                                                                                                                                                                                                | –          |
| Test for the<br>Reception of<br>Grammar<br>(TROG)           | -                                                      | NA        | NA        | NA        | NA | NA                                                                                                                                                                                                                                                                            | NA         |
| Weschler<br>Intelligence<br>Scale for<br>Children<br>(WISC) | Weschler et al.,<br>2014                               | .88 – .96 | .71 – .94 | .97 – .99 | –  | WISC–V & WISC–<br>IV – .43 – .86<br><br>WISC–V &<br>WPPSI–IV – .24 –<br>83<br><br>WISC–V & KABC–<br>II – –.26 – .80<br><br>WISC–V & KTEA–3<br>– –.1 – .82<br><br>WISC–V & WIAT–<br>III – –.12 – .78<br><br>WISC–V & VABS<br>–.33–.58<br><br>WISC–V – BASC–2<br>–<br>–.20 –.11 | .73 – 5.24 |



---

Can discriminate  
TD with gifted,  
intellectual  
disability, SLD,  
ADHD, disruptive  
behavior samples,  
TBI, ASD,  
language learners,  
+ more

---

NA = No Access; The authors did not have access to the measure or technical manual including a psychometric property review. Attempts to contact the authors/publishers for information regarding the psychometric properties of the measures were made but a response was not received in time for the manuscript revision deadline.

Measure abbreviations: CASL = Comprehensive Assessment of Spoken Language; CAT = California Achievement Test; EVT = Expressive Vocabulary Test; GRADE = Group Reading Assessment and Diagnostic Evaluation; KTEA = Kaufman Test of Individual Achievement; PIAT = Peabody Individual Achievement Test; PPVT = Picture Vocabulary Test; WJ = Woodcock Johnson; WPPSI = Weschler Preschool and Primary Scale of Intelligence

Sample type abbreviations: ADHD = Attention-Deficit Hyperactivity Disorder; ASD = Autism Spectrum Disorder; TBI = Traumatic Brain Injury; TD = Typically-Developing

\*Psychometric review can be found in (Denham et al., 2017)

## References

- Abraham, J.E., & Lindsay, G.A. (1990). *The Junior Rating Scale*. Windsor: NFER-Nelson.
- Achenbach, T.M., & Rescorla, L.A. (2001). *Manual for the ASEBA School-Age Forms & Profiles*. Burlington, VT: University of Vermont, Research Center for Children, Youth, & Families.
- Albers, C. A., & Grieve, A. J. (2007). Test Review: Bayley, N. (2006). Bayley Scales of Infant and Toddler Development– Third Edition. San Antonio, TX: Harcourt Assessment. *Journal of Psychoeducational Assessment*, 25(2), 180–190. <https://doi.org/10.1177/0734282906297199>
- Bayley, N. (2006). *Bayley Scales of Infant and Toddler Development–Third Edition*. San Antonio, TX: Harcourt Assessment.
- Bishop, D. V. M. (1998). Development of the Children’s Communication Checklist (CCC): A method for assessing qualitative aspects of communicative impairment in children. *Journal of Child Psychology and Psychiatry*, 39(6), 879-891.
- Breinbauer, C., Mancil, T. L., & Greenspan, S. (2010). The Bayley-III Social-Emotional Scale. In L. G. Weiss, T. Oakland, & G. P. Ayland (Ed.), *Bayley-III clinical use and interpretation* (pp. 147-175). Academic Press.
- Carter, A. S., Briggs-Gowan, M. J., Jones, S. M., & Little, T. D. (2003). The Infant-Toddler Social and Emotional Assessment (ITSEA): Factor structure, reliability, and validity. *Journal of Abnormal Child Psychology*, 31(5), 485-514.
- Dale, P. S., Bates, E., Reznick, J. S., & Morisset, C. (1989). The validity of a parent report instrument of child language at twenty months. *Journal of Child Language*, 16(2), 239–249. <https://doi.org/10.1017/S0305000900010394>

- Denman, D., Speyer, R., Munro, N., Pearce, W. M., Chen, Y. W., & Cordier, R. (2017). Psychometric properties of language assessments for children aged 4-12 years: A systematic review. *Frontiers in Psychology*, 8, 1515.  
<https://doi.org/10.3389/fpsyg.2017.01515>
- Dunn, L.M., & Dunn, D.M. (2007). *The Peabody Picture Vocabulary Test, Fourth Edition*. Bloomington, MN: NCS Pearson, Inc.
- Gathercole, S. E., Willis, C. S., Baddeley, A. D., & Emslie, H. (1994). The Children's Test of Nonword Repetition: A test of phonological working memory. *Memory*, 2(2), 103-127.
- Gibson, J., Hussain, J., Adams, C., Holsgrove, S., & Green, J. (2011). Quantifying children's peer interactions for research and clinical use: The Manchester Inventory for Playground Observation MIPO. *Research in Developmental Disabilities*, 32, 2458–2466.
- Goodman, R. (2001). Psychometric properties of the Strengths and Difficulties Questionnaire. *Journal of the American Academy of Child and Adolescent Psychiatry*, 40(11), 1337-1345.
- Hamill, D. D. & Newcomer, P. L. (1997). *Test of Language Development-Primary 3 (TOLD-P:3)*. Austin, TX: ProEd.
- Harter, S. (2012). *Self-Perception Profile for Children: Manual and Questionnaires (Grades 3–8)* Denver: University of Denver.
- Harter, S. & Pike, R. (1984). The Pictorial Scale of Perceived Competence and Social Acceptance for Young Children. *Child Development*, 55(6), 1969-1982.
- Hayward, D. V., Stewart, G. E., Phillips, L. M., Norris, S. P., & Lovell, M. A. (2008). Test review: Test of language development-primary 3<sup>rd</sup> edition (TOLD-P:3). *Language, Phonological Awareness, and Reading Test Directory* (pp. 1-11). Edmonton, AB:

Canadian Centre for Research on Literacy. Retrieved July 23, 2023 from

<http://www.uofaweb.ualberta.ca/elementaryed/ccrl.cfm>

- Kadesjö, B., Janols, L.-O., Korkman, M., Mickelsson, K., Strand, G., Trillingsgaard, A., & Gillberg, C. (2004). The FTF (Five to Fifteen): the development of a parent questionnaire for the assessment of ADHD and comorbid conditions. *European Child & Adolescent Psychiatry*, 13 Suppl 3(S3), 3–13. <https://doi.org/10.1007/s00787-004-3002-2>
- Kaufman, A. S., O'Neal, M. R., Avant, A. H., & Long, S. W. (1987). Introduction to the Kaufman Assessment Battery for Children (K-ABC) for pediatric neuroclinicians. *Journal of Child Neurology*, 2(1), 3–16. <https://doi.org/10.1177/088307388700200102>
- Kohn, M. (1977). The Kohn Social Competence Scale and Kohn Symptom Checklist for the preschool child: A follow-up report. *Journal of Abnormal Child Psychology*, 5, 249-263.
- Korkman, M., Jaakkola, M., Ahlroth, A., Pesonen, A. E., & Turunen, M. M. (2004). Screening of developmental disorders in five-year-olds using the FTF (Five to Fifteen) questionnaire: a validation study. *European Child & Adolescent Psychiatry*, 13 Suppl 3, 31–38. <https://doi.org/10.1007/s00787-004-3005-z>
- Lacher, D. *Personality Inventory for Children (PIC): Revised format manual supplement*. Los Angeles: Western Psychological Services, 1982.
- Letts, C., Edwards, S., Schaefer, B., Sinka, I. (2014). The New Reynell Developmental Language Scales: Descriptive account and illustrative case study. *Child Language Teaching and Therapy*, 30(1), 103-116.
- Martin, N., & Brownell, R. (2010). *Receptive one-word picture vocabulary test* (4th ed.). Novato: Academic Therapy Publications.

Mendoza, E., Carballo, G., Muñoz, J., & Fresneda, M. D. (2005). *Test de Comprensio'n de Estructuras Gramaticales (CEG)*. Madrid:

TEA – Ediciones

Ravens-Sieberer, U., Gosch, A., Rajmil, L., Erhart, M., Bruil, J., Duer, W., Auquier, P., Power, M., Abel, T., Czemy, L., Mazur, J.,

Czimbalmos, A., Tountas, Y., Hagquist, C., Kilroe, J., & KIDSCREEN Group, E. (2005). KIDSCREEN-52 quality-of-life

measure for children and adolescents. *Expert Review of Pharmacoeconomics & Outcomes Research*, 5(3), 353+. [https://link-](https://link-gale-com.ezproxy.lib.ucalgary.ca/apps/doc/A242317631/HRCA?u=ucalgary&sid=bookmark-HRCA&xid=a690faa2)

[gale-com.ezproxy.lib.ucalgary.ca/apps/doc/A242317631/HRCA?u=ucalgary&sid=bookmark-HRCA&xid=a690faa2](https://link-gale-com.ezproxy.lib.ucalgary.ca/apps/doc/A242317631/HRCA?u=ucalgary&sid=bookmark-HRCA&xid=a690faa2)

Roid, G. H. (2003). *Stanford-Binet Intelligence Scales, Fifth Edition, Technical Manual*. Itasca, IL: Riverside Publishing.

Rutter, M. (1967). A children's behaviour questionnaire for completion by teachers: Preliminary findings. *Child Psychology &*

*Psychiatry & Allied Disciplines*, 8(1), 1–11. <https://doi.org/10.1111/j.1469-7610.1967.tb02175.x>

Saborit, C., & Julia, J. P. (2005). *L'avaluacio' del llenguatge infantil*. ELI. Universitat Jaume I de Castello'n. Coleccio'n:

Educacion.

Sands, R. & D'Amato, R. C. (2018). *McCarthy Scales of Children's Abilities*. In J. S. Kreutzer, J. DeLuca, & Caplan, B. (Eds.),

*Encyclopedia of Clinical Neuropsychology* (pp. 2092-2093). Springer Cham.

Semel, E., Wiig, E., & Secord, W. (2003). *Clinical Evaluation of Language Fundamentals-4th Edition*. San Antonio, TX: The

Psychological Corporation.

- Trillingsgaard, A., Damm, D., Sommer, S., Jepsen, J. R., Ostergaard, O., Frydenberg, M., & Thomsen, P. H. (2004). Developmental profiles on the basis of the FTF (Five to Fifteen) questionnaire-clinical validity and utility of the FTF in a child psychiatric sample. *European child & adolescent psychiatry, 13 Suppl 3*, 39–63. <https://doi.org/10.1007/s00787-004-3006-y>
- Varni, J. W., Seid, M., & Kurtin, P. S. (2001). PedsQL™ 4.0: reliability and validity of the Pediatric Quality of Life Inventory™ version 4.0 generic core scales in healthy and patient populations. *Medical Care, 39*(8), 800–812.
- Wiig, E H., Semel, E., Secord, W. A. (2013). *Clinical Evaluation of Language Fundamentals-Fifth Edition (CELF-5): Technical Manual*. Bloomington, MN: NCS Pearson
- Zimmerman, I. L., Steiner, V, G., & Pond, E. (2011). *Preschool Language Scales- Fifth Edition (PLS-5)*. San Antonio, TX: Pearson
